# Supplementary material for: Gene networks and expression quantitative trait loci associated with adjuvant chemotherapy response in high-grade serous ovarian cancer
Source: PubMed Central journal article supplement (PMC7218510; doi:10.1186/s12885-020-06922-1), 2020-05-13
Supplement: 12885_2020_6922_MOESM2_ESM.pdf [file 12885_2020_6922_MOESM2_ESM.pdf]

# TCGA-OV genotype imputation log

## Variant imputation

Michigan imputation server (<https://imputationserver.sph.umich.edu>) was used to impute for missing genotypes.

### Autosomes (chr 1 – 22)

Chromosomes: 1 2 3 4 5 6 7 8 9 10 11 12 13 14 15 16 17 18 19 20 21 22

SNPs: 868263

Chunks: 153

Datatype: unphased

Reference Panel: phase3

Phasing: eagle

### **Statistics:**

Alternative allele frequency > 0.5 sites: 235,699

Reference Overlap: 99.67%

Match: 860,761

Allele switch: 0

Strand flip: 0

Strand flip and allele switch: 0

A/T, C/G genotypes: 0

### **Filtered sites:**

Filter flag set: 0

Invalid alleles: 448

Duplicated sites: 2

NonSNP sites: 0

Monomorphic sites: 1,088

Allele mismatch: 3,105

SNPs call rate < 90%: 0

## **X chromosome**

Chromosomes: X

SNPs: 36764

Chunks: 8

Datatype: unphased

Reference Panel: phase3

Phasing: shapeit

### **Statistics:**

Alternative allele frequency > 0.5 sites: 0

Reference Overlap: 99.05%

Match: 26,353

Allele switch: 7,769

Strand flip: 0

Strand flip and allele switch: 0

A/T, C/G genotypes: 1,383

### **Filtered sites:**

Filter flag set: 0

Invalid alleles: 0

Duplicated sites: 0

NonSNP sites: 0

Monomorphic sites: 785

Allele mismatch: 133

SNPs call rate < 90%: 0

## **Total number of variants**

|                          | <b>Autosomes</b> | <b>X-chromosome</b> |
|--------------------------|------------------|---------------------|
| <b>Before imputation</b> | 868,263          | 36,764              |
| <b>After imputation</b>  | 46,181,723       | 1,778,607           |
